# Supplementary material
Source: PubMed Central journal article supplement (PMC2529036)
Supplement: 0805120105_0805120105SI.pdf [file 0805120105_0805120105SI.pdf]

# Supporting Information

Pandya *et al.* 10.1073/pnas.0805120105

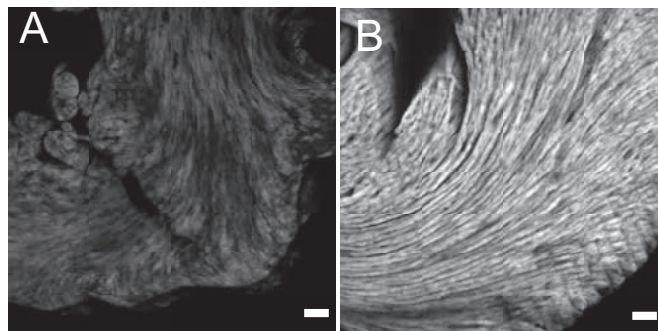

**Fig. S1.** Developmental expression of the CFP transgene in perinatal ventricles. Thick ventricular sections from neonatal day 1 (*A*) and day 10 (*B*) transgenic animals imaged through a CFP filter with a  $\times 20$  immersion objective. Identical settings were used to acquire the two images (Scale bar: 50 microns).

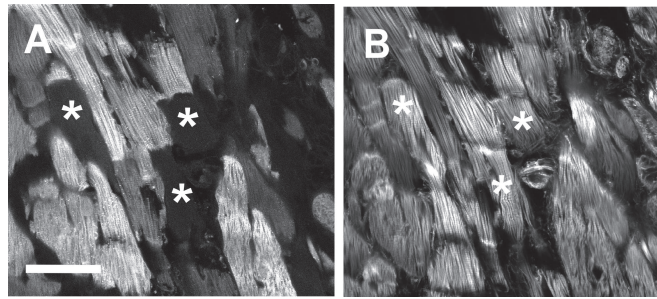

**Fig. S2.** Myocytes with lowered expression of  $\alpha$ MHC are not dead. Confocal images of a single vibratome transverse section from a transgenic TAC heart imaged with a CFP filter (A) or a Tritc filter (B; Phalloidin), using  $\times 60$  oil immersion objectives. \* indicates cells that have low levels of CFP and normal cytoskeletons. (Scale bar: 50 microns.)

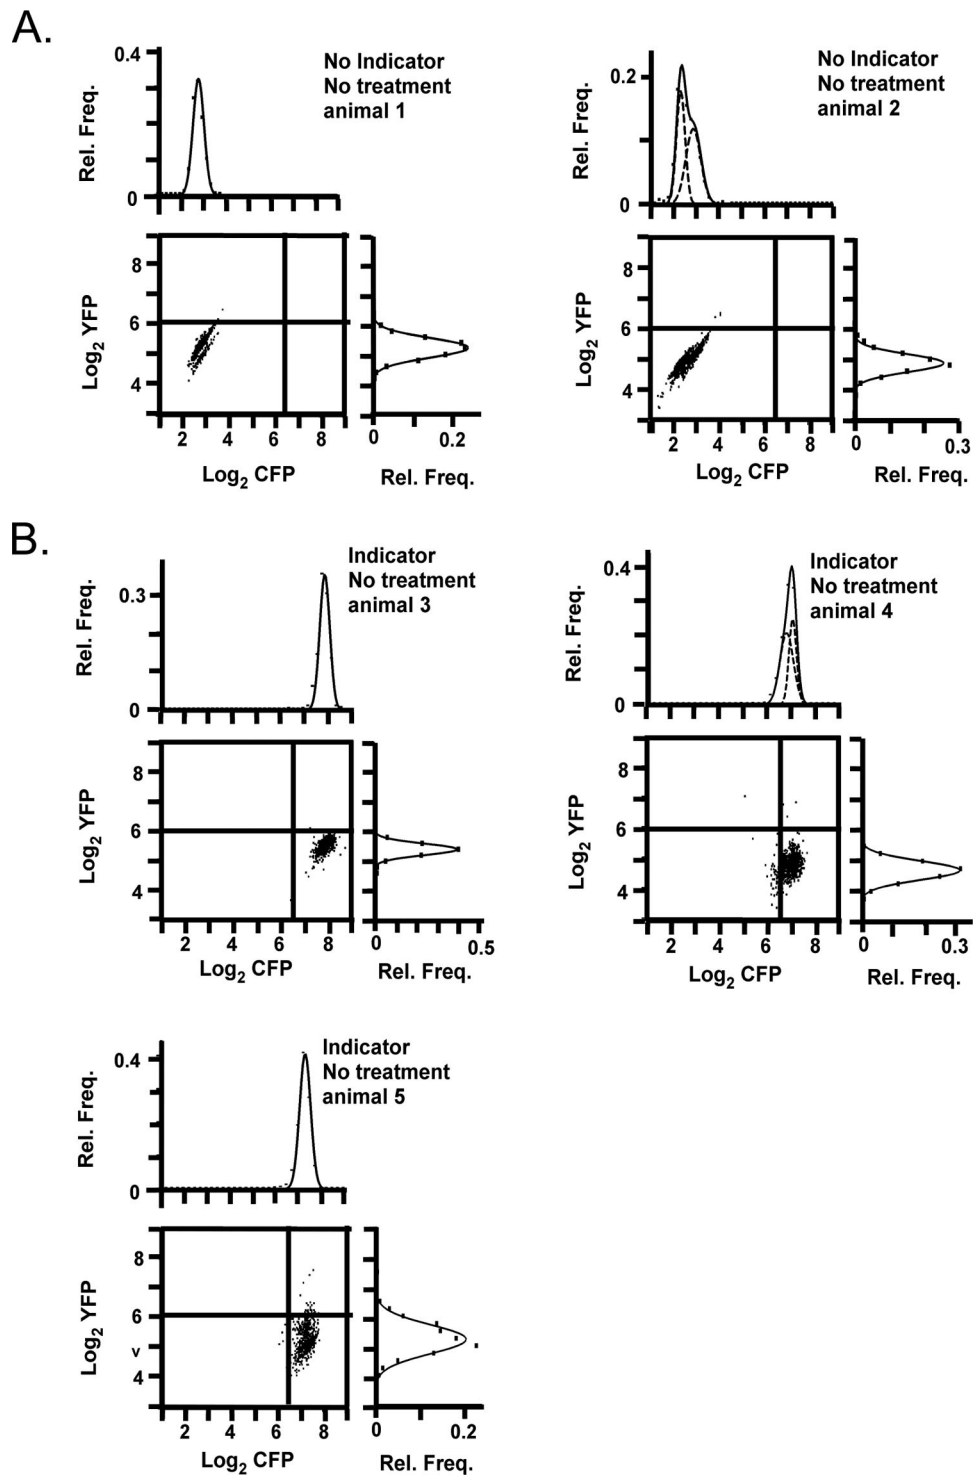

**Fig. S3.** MHC isoform switching in control animals without TAC. Bivariate scatterplots representing  $\log_2$  of average pixel intensity per cell of CFP (x axis) and YFP (y axis) of ventricular cells in individual animals with no indicator/no treatment (A) and indicator/no treatment (B). See Fig. 4 for descriptions of individual curves.

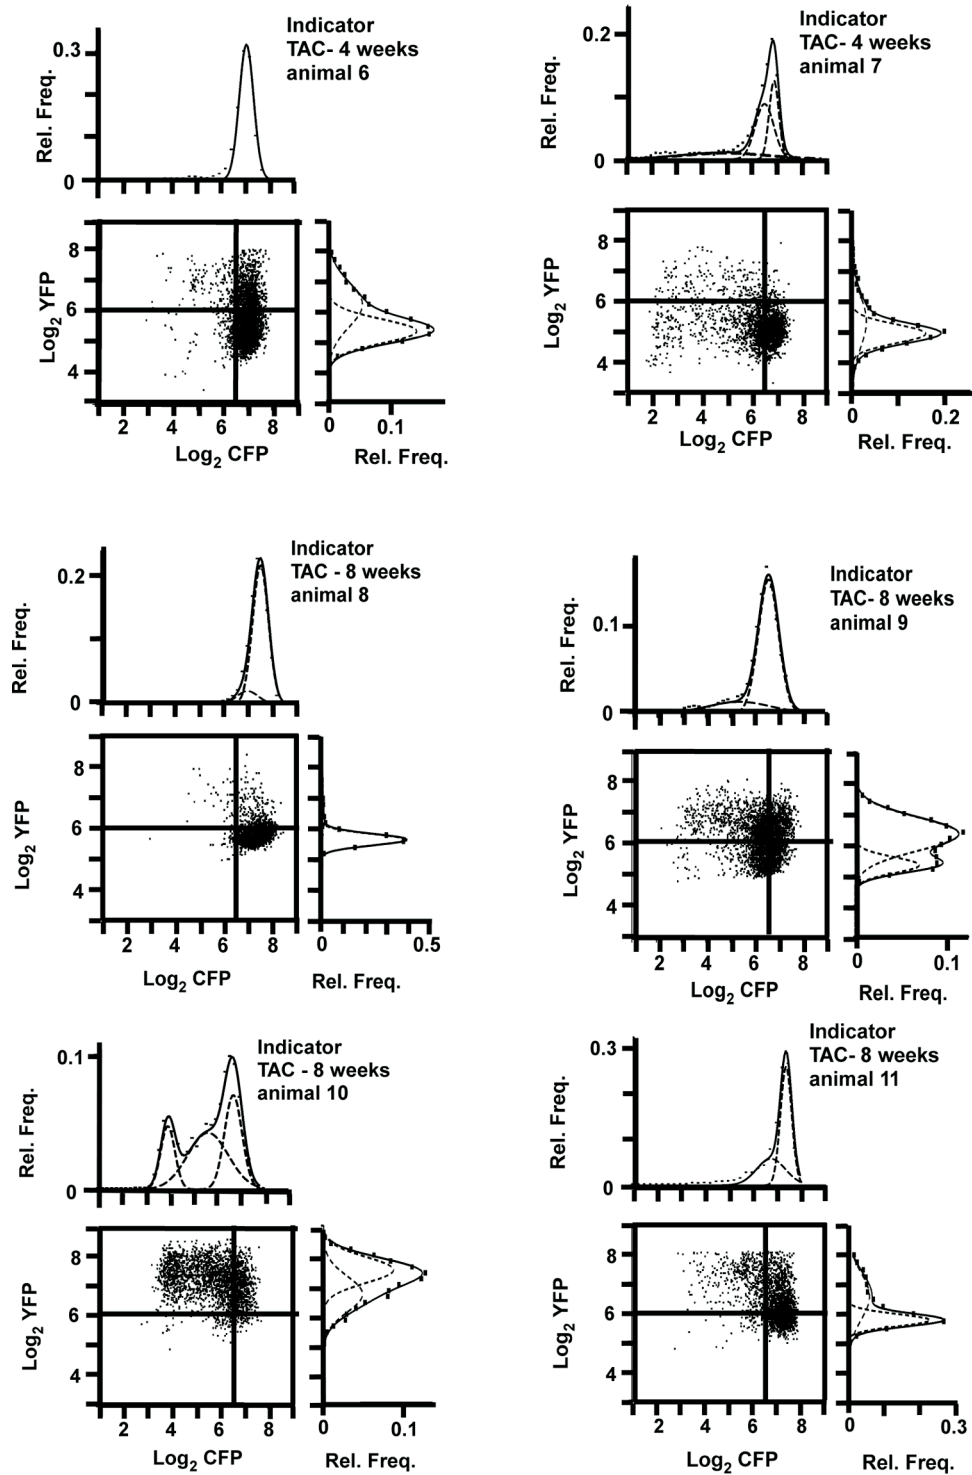

Fig. S4. MHC isoform switching in TAC-treated animals. Bivariate scatterplots representing log<sub>2</sub> of average pixel intensity per cell of CFP (x axis) and YFP (y axis) of ventricular cells in individual animals with indicator, TAC treatment for 4 or 8 weeks. See Fig. 4 for descriptions of individual curves.

**Table S1. Echocardiographic parameters**

| Parameter     | Sham       | TAC        | <i>P</i> |
|---------------|------------|------------|----------|
| <i>n</i>      | 6          | 9          |          |
| LVEDD, mm     | 4.0±/ 0.1  | 4.5±/ 0.1  | 0.01     |
| LVESD, mm     | 1.6±/ 0.1  | 2.8±/ 0.3  | 0.006    |
| FS, %         | 0.55±/0.10 | 0.38±/0.10 | 0.001    |
| IVS, mm       | 1.1±/ 0.1  | 1.1±/ 0.1  | NS       |
| PW, mm        | 1.0±/ 0.1  | 1.1±/ 0.1  | NS       |
| HR, beats/min | 650±/ 22   | 647±/ 20   | NS       |
| LVm, mg       | 154±/ 16   | 234±/ 16   | 0.006    |
| mVcfc         | 4.9±/ 0.3  | 3.3±/ 0.3  | 0.003    |
| SPG           |            | 72±/ 11    |          |

*n*, number of animals in each group; LVEDD, left ventricular end diastolic diameter; LVESD, left ventricular end systolic diameter; IVS, interventricular septum; PW, posterior wall; HR, heart rate; FS, fractional shortening; LVm, left ventricular mass; mVcfc, mean velocity of circumferential fiber shortening; SPG, systolic pressure gradient; NS, not significant. Animals were sham- or TAC-treated for 4 weeks.
